# Supplementary material for: Recombinant Antigens Based on Non-Glycosylated Regions from RBD SARS-CoV-2 as Potential Vaccine Candidates against COVID-19
Source: MDPI journal article supplement (doi:10.3390/vaccines9080928), 2021-08-20
Supplement: s1 [file s1]

## Supplementary Material

**Figure S1.** Prediction of secondary structure for NG06 and NG19 antigens.

**Figure S2.** Validation of three-dimensional models of NG06 and NG19 using the Z-Score and local quality values.

**Figure S3.** Ramachandran plots for validation of the *de novo* predicted structures for the NG06 and NG19 proteins.

**Figure S4.** Chromatographic steps through FLPC for NG06 purification.

**Figure S5.** Chromatographic steps through FLPC for NG19 purification.

**Figure S6.** *In silico* oligomerization of NG19

**Figure S7.** Comparison of antigen affinity for NG recombinant proteins and native RBD

**Table S1.** Primer sequence employed in the present study.

**Table S2.** Primary structure and physicochemical properties of vaccine antigen candidates

**Table S3:** Hematological values of the immunized rabbits at day 35



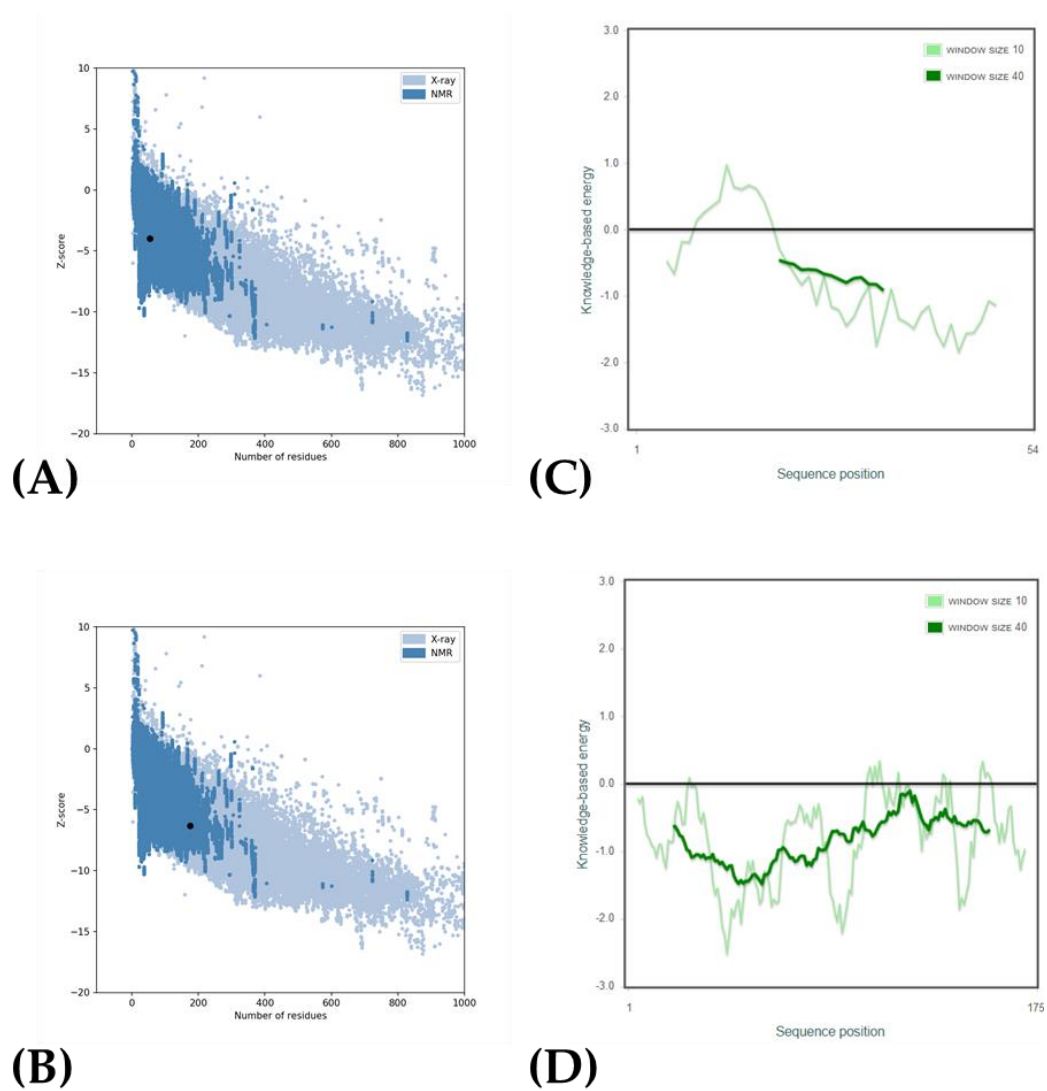

**Figure S2.** Validation of three-dimensional models of NG06 (A) and NG19 (B) using the Z-Score and local quality values for NG06 (C) and NG19 (D)

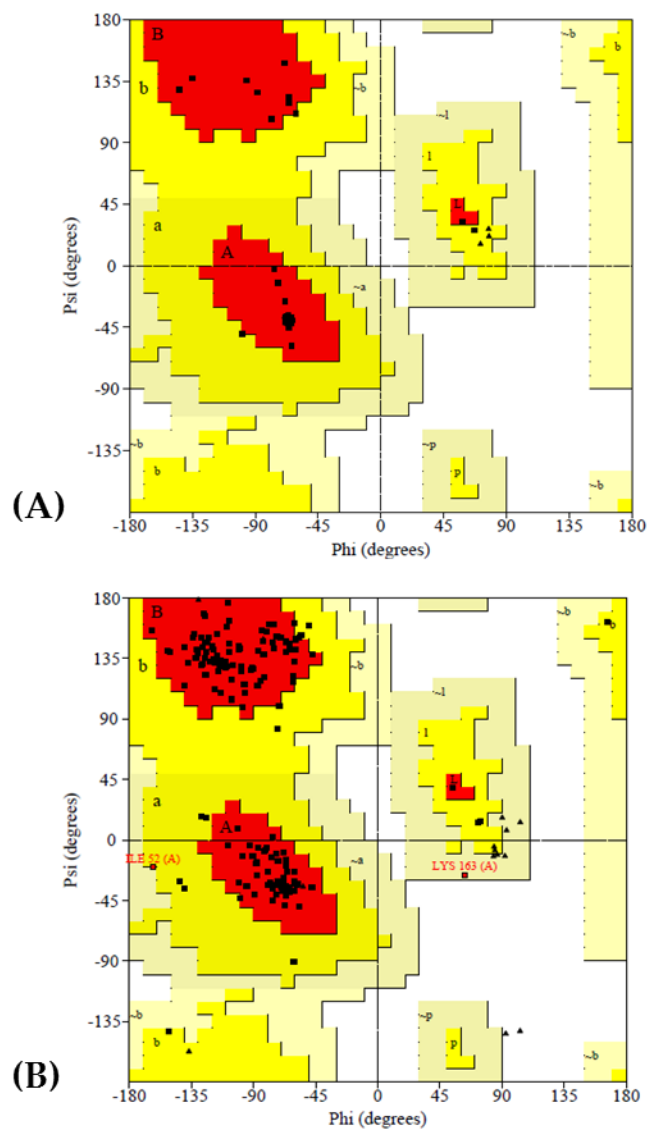

**Figure S3.** Ramachandran plots for validation of the de novo predicted structures for the NG06 (A) and NG19 (B) proteins

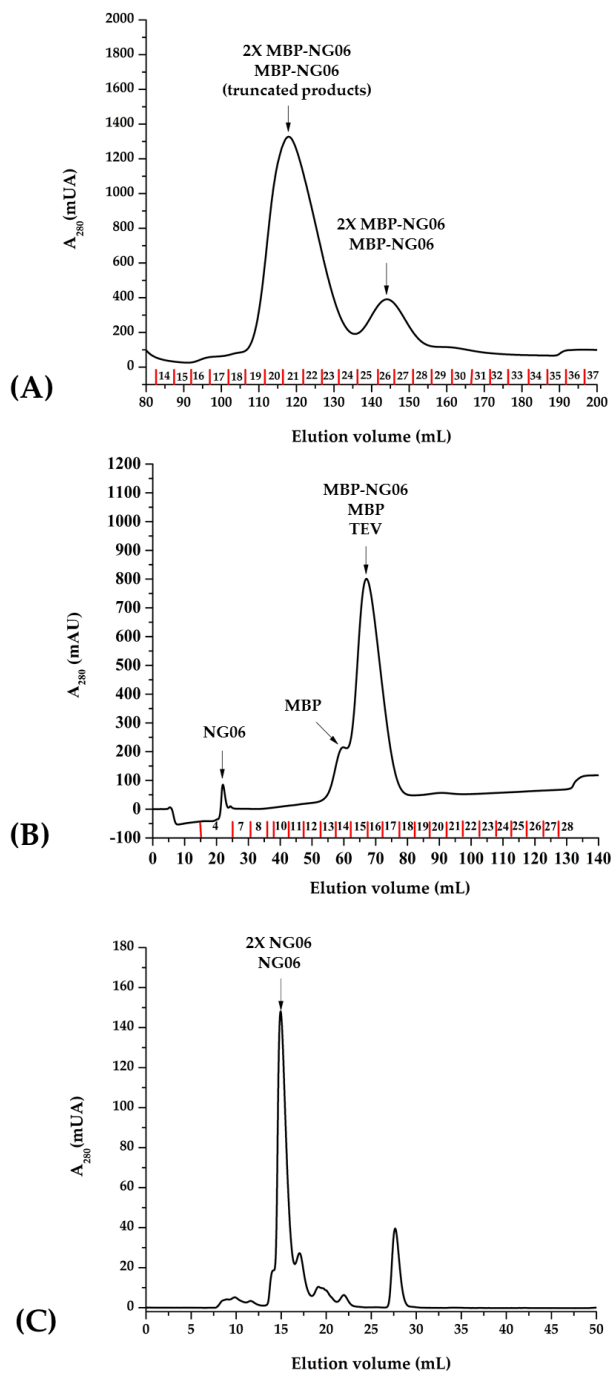

**Figure S4.** Chromatographic steps through FLPC for NG06 purification. A) Initial IMAC Chromatogram for NG06. B) Buffer exchange chromatogram for NG06 C) After TEV cleavage IMAC chromatogram for NG06. D) Final buffer exchange for NG06 purification

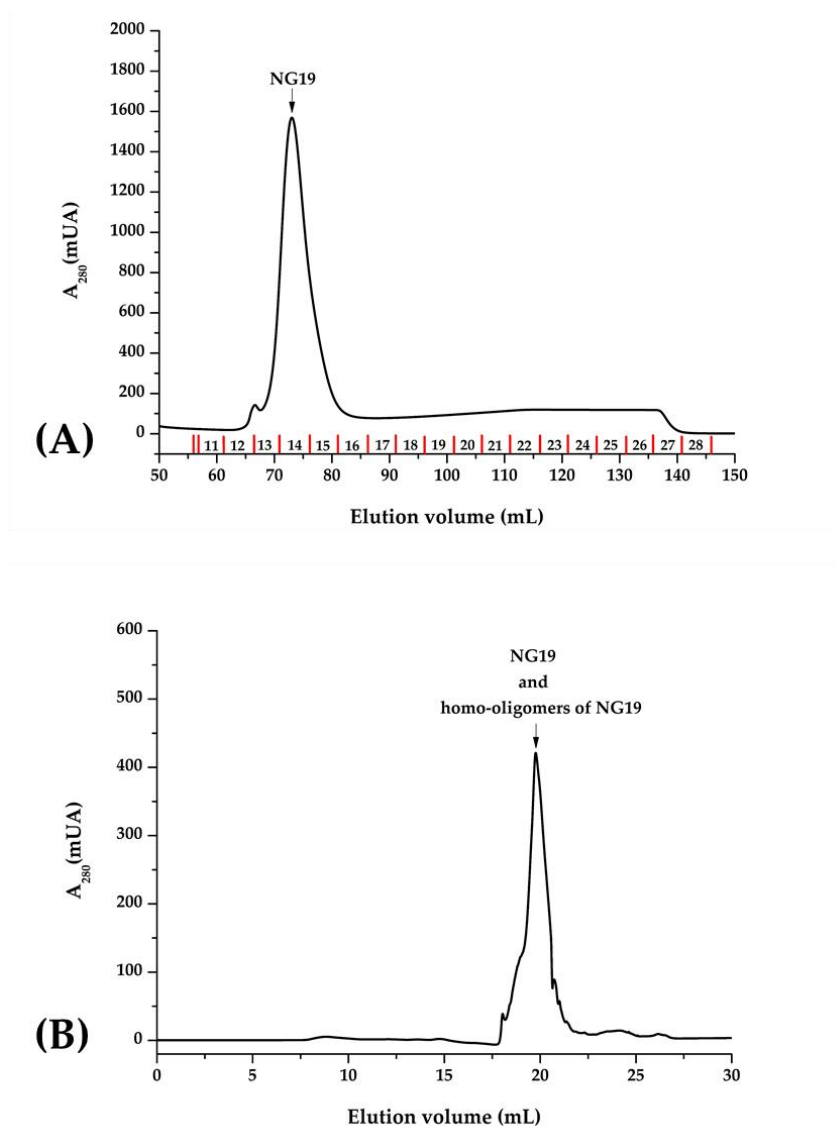

**Figure S5.** Chromatographic steps through FLPC for NG19 purification. A) Initial IMAC Chromatogram for NG19. B) SEC-Refolding chromatogram for NG19

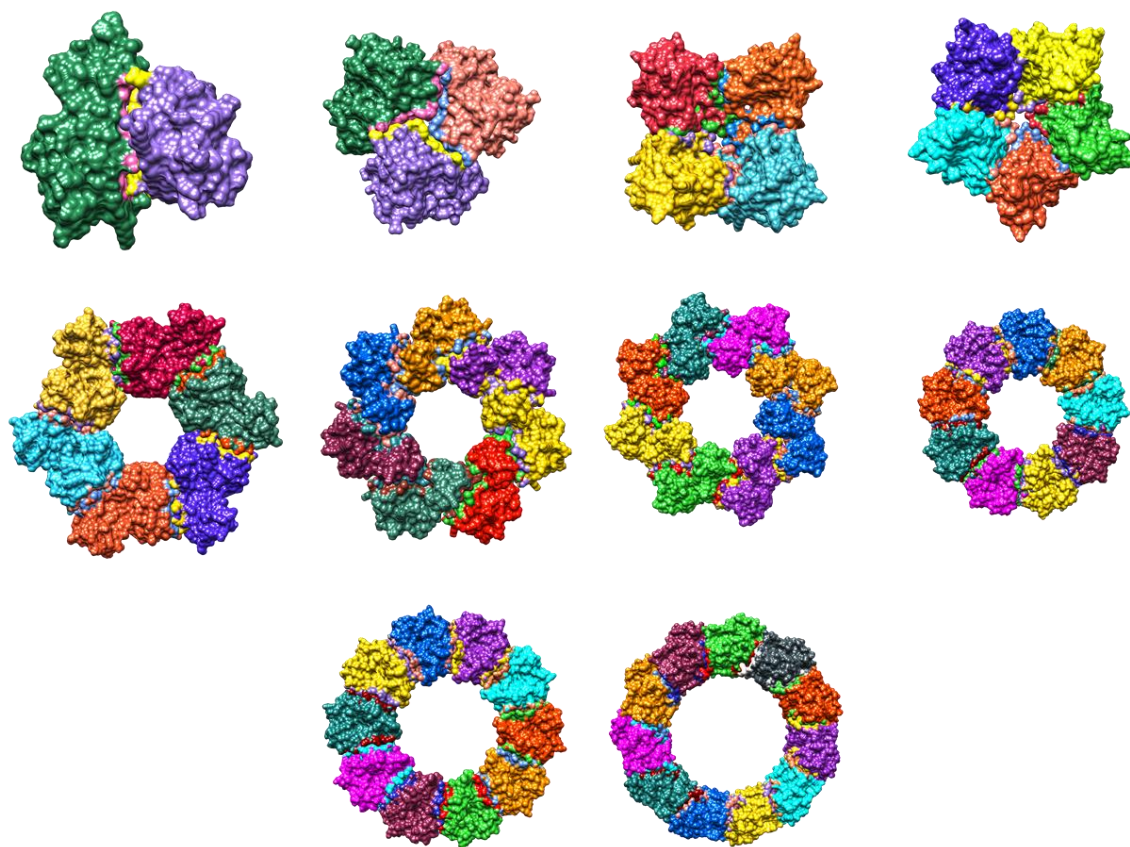

**Figure S6:** *In silico* oligomerization of NG19

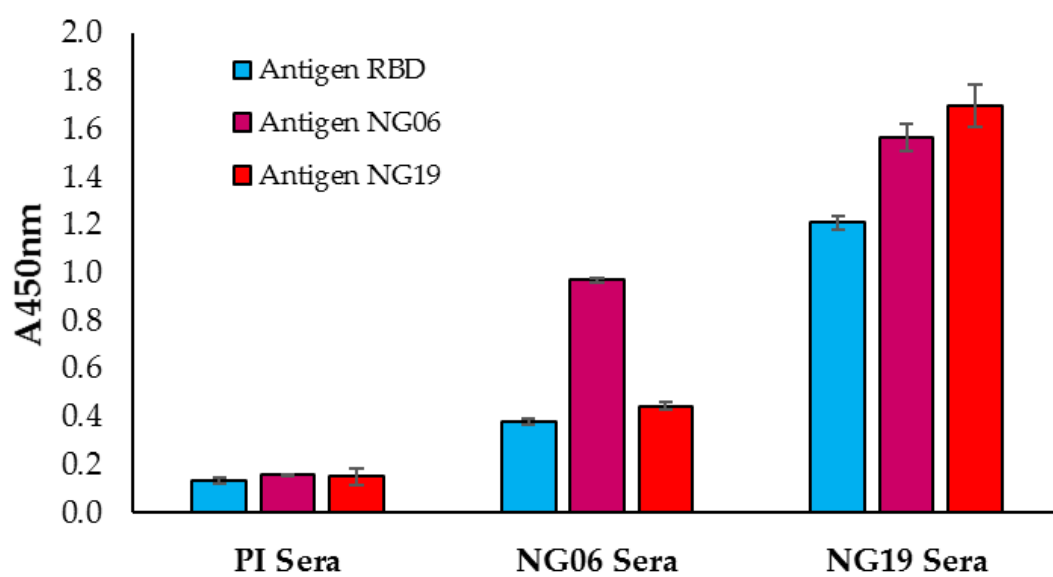

**Figure S7:** Comparison of antigen affinity for NG recombinant proteins and native RBD.



**Table S1.** Primer sequence employed in the present study

| Primer Name        | Sequence ('5→3')                    |
|--------------------|-------------------------------------|
| eNG06-F            | AGCAACAACCTGGATAGCAAAGTCGGCGG       |
| eNG06-STOP-R       | TTAGTTAAAACCTTCAACGCCGTTACACG       |
| eNG19-F            | AGCGCGAGCTTCTCCACCTTCAAATGCTATG     |
| eNG19-KWCEC-STOP-R | TTAGCATTCGCACCATTTGAAGTTGACGCATT    |
| eNG06-STOP-R       | TTAGAAGTTGACGCATTTGTTTTTGACCAGGT    |
| NcoI-eNG06-F       | CATGCCATGGCCAGCAACAACCTGGATAGCAAAG  |
| HindIII-eNG06-R    | CCCAAGCTTTTAGTTAAAACCTTCAACGCCGTTAC |
| NcoI-eNG19-F       | CATGCCATGGCCAGCGCGAGCTTCTCCACCTTC   |
| HindIII-eNG19-R    | CCCAAGCTTTTAGAAGTTGACGCATTTGTTTTTG  |

\* Restriction sites for NcoI and HindIII are shown in bold.

**Table S2.** Primary structure and physicochemical properties of vaccine antigen candidates

|                           | NG06           | NG19           |
|---------------------------|----------------|----------------|
| Length (aa)               | 54             | 175            |
| Molecular Weight (kDa)    | 6.0            | 19.4           |
| Positive Charged Residues | 6 (11.1%)      | 17 (9.7%)      |
| Negative Charged Residues | 5 (9.3%)       | 13 (7.4%)      |
| Isoelectric Point         | 8.10           | 8.64           |
| Instability Index         | 12.08 (stable) | 16.64 (stable) |

**Table S3:** Hematological values of the immunized rabbits at day 35

|                    |                                                      | NG06     | NG19     | Reference Values  |
|--------------------|------------------------------------------------------|----------|----------|-------------------|
| <b>Hemogram</b>    | <b>Hematocrit (L/L)</b>                              | 0.45     | 0.41     | 0.34-0.50         |
|                    | <b>Hemoglobin (g/L)</b>                              | 144.00   | 123.00   | 98.00-158.00      |
|                    | <b>Erythrocytes (<math>\times 10^{12}/L</math>)</b>  | 6.50     | 6.30     | 5.10-6.50         |
|                    | <b>MCV (fL)</b>                                      | 69.00    | 65.00    | 57.80-80.30       |
|                    | <b>MCHC (g/L)</b>                                    | 320.00   | 300.00   | 287.00-357.00     |
|                    | <b>Platelets (<math>\times 10^9/L</math>)</b>        | 201.00   | 512.00   | -                 |
|                    | <b>Proteins (g/L)</b>                                | 60.00    | 70.00    | 60.00-75.00       |
|                    | <b>Reticulocytes (%)</b>                             | 1.70     | 2.10     | 0.00-3.00         |
| <b>Diferential</b> | <b>Total Leukocytes (<math>\times 10^9/L</math>)</b> | 6.60     | 19.80    | 5.00-12.00        |
|                    | <b>Total Neutrophils (%)</b>                         | 56.10    | 77.98    | 18.80-46.40       |
|                    | <b>Band Neutrophils (<math>\times 10^9/L</math>)</b> | 0.00     | 0.00     | 0.00-0.30         |
|                    | <b>Metamyelocytes (<math>\times 10^9/L</math>)</b>   | 0.00     | 0.00     | 0.00-0.00         |
|                    | <b>Myelocytes (<math>\times 10^9/L</math>)</b>       | 0.00     | 0.00     | 0.00-0.00         |
|                    | <b>Lymphocytes (%)</b>                               | 38.03    | 11.01    | 44.60-77.80       |
|                    | <b>Monocytes (%)</b>                                 | 1.97     | 10.00    | 0.00-13.00        |
|                    | <b>Eosinophils (%)</b>                               | 0.00     | 0.00     | 0.00-2.40         |
|                    | <b>Basophils (%)</b>                                 | 5.00     | 1.01     | 0.00-6.20         |
|                    | <b>Nucleated eosinophils<br/>(/100 Leucocytes)</b>   | 0.00     | 0.00     | 0.00-0.00         |
|                    | <b>Toxic neutrophils</b>                             | Negative | Negative | Negative          |
|                    | <b>Atypical lymphocytes</b>                          | Negative | Negative | Negative          |
|                    | <b>Erythrocyte morphology</b>                        | Normal   | Normal   | Normal            |
|                    | <b>Anisocytosis</b>                                  | Positive | Positive | Positive/Negative |
|                    | <b>Polychromasia</b>                                 | Positive | Positive | Positive          |
|                    | <b>Hemoparasites</b>                                 | Negative | Negative | Negative          |
|                    | <b>Dirofilaria</b>                                   | Negative | Negative | Negative          |
|                    | <b>Inclusion bodies</b>                              | Negative | Negative | Negative          |
|                    | <b>Clumped platelets</b>                             | Positive | Negative | Negative          |
